# Supplementary material
Source: HighWire-hosted journal article supplement (https://jmg.bmj.com/content/54/4/260)
Supplement: inline-supplementary-material-1 [file inline-supplementary-material-1.pdf]

Table S1: Extended phenotypic information for samples processed for ES and WGS.

| Family #               | Sample            | Sex | Sample ID | Referring Clinic <sup>+</sup> | Seq method | Library kit | Syndromic <sup>s</sup> | Suture involvement | Additional clinical manifestations                                                                                                                                                                                                                                                                    | Family history                                                                                           | Population (if non-European) | Mutation Positive |                      |                    |                            |
|------------------------|-------------------|-----|-----------|-------------------------------|------------|-------------|------------------------|--------------------|-------------------------------------------------------------------------------------------------------------------------------------------------------------------------------------------------------------------------------------------------------------------------------------------------------|----------------------------------------------------------------------------------------------------------|------------------------------|-------------------|----------------------|--------------------|----------------------------|
|                        |                   |     |           |                               |            |             |                        |                    |                                                                                                                                                                                                                                                                                                       |                                                                                                          |                              | Gene              | Genomic              | Protein            | Inheritance/all elic state |
| Clinical genetic cases |                   |     |           |                               |            |             |                        |                    |                                                                                                                                                                                                                                                                                                       |                                                                                                          |                              |                   |                      |                    |                            |
| 1                      | Proband           | M   | 5490      | BCH                           | Exome      | TruSeq      | Y                      | P                  | Learning disability, prominent eyes, hypertelorism, ?submucous cleft, mild syndactyly fingers, limited pronation both arms, broad great toes, perimembraneous ventricular septal defect, coarctation of aorta, choanal atresia, bilateral inguinal hernia, hearing loss (bone anchored hearing aids). | Mother with similar facial features, atrial septal defect, mild learning disability, no craniosynostosis |                              | -                 | -                    | -                  | -                          |
| 2                      | Proband           | F   | 5383      | BCH                           | Exome      | TruSeq      | Y                      | S, BC              | Exorbitism, abnormal posture R arm. long, slender fingers. Evolving pansynostosis and recurrent synostosis post surgery                                                                                                                                                                               |                                                                                                          |                              | -                 | -                    | -                  | -                          |
|                        | Unaffected mother | F   | 5406      |                               |            |             |                        |                    |                                                                                                                                                                                                                                                                                                       |                                                                                                          |                              |                   |                      |                    |                            |
|                        | Unaffected father | M   | 5407      |                               |            |             |                        |                    |                                                                                                                                                                                                                                                                                                       |                                                                                                          |                              |                   |                      |                    |                            |
| 3                      | Proband           | F   | 4964      | GOS                           | Exome      | TruSeq      | Y                      | BC                 | Short stature, thin eyebrows, anteriorly placed anus                                                                                                                                                                                                                                                  |                                                                                                          |                              | <i>CDC45</i>      | c.[226A>C]; [469C>T] | p.[N76H];[R157C]   | Compound heterozygous      |
| 4                      | Proband           | M   | 5627      | GOS                           | Exome      | TruSeq      | Y                      | P                  | Exorbitism, intellectual disability, atopy (eczema, asthma, dietary allergies). ?Crouzon syndrome                                                                                                                                                                                                     | Parents 1st cousins                                                                                      | South Asian                  | <i>IL11RA</i>     | c.[886C>T]; [886C>T] | p.[R296W]; [R296W] | Homozygous                 |
| 5                      | Proband           | M   | 5630      | GOS                           | Exome      | TruSeq      | Y                      | S, BC              | Exorbitism, gum hypertrophy, disrupted dental eruption. Hairy external auditory meatus                                                                                                                                                                                                                |                                                                                                          |                              | -                 | -                    | -                  | -                          |
|                        | Unaffected mother | F   | 5631      |                               |            |             |                        |                    |                                                                                                                                                                                                                                                                                                       |                                                                                                          |                              |                   |                      |                    |                            |
|                        | Unaffected father | M   | 5632      |                               |            |             |                        |                    |                                                                                                                                                                                                                                                                                                       |                                                                                                          |                              |                   |                      |                    |                            |
| 6                      | Proband           | F   | 5626      | GOS                           | Exome      | TruSeq      | Y                      | S, BL              | Upslanting palpebral fissures, mild exorbitism, hypertelorism, mild ptosis, mild 5th finger clinodactyly, anterior                                                                                                                                                                                    |                                                                                                          |                              | -                 | -                    | -                  | -                          |

|    |                   |   |      |     |       |        |       |           |                                                                                                                                                                                                |                                          |             |               |                      |                      |              |                                                                        |
|----|-------------------|---|------|-----|-------|--------|-------|-----------|------------------------------------------------------------------------------------------------------------------------------------------------------------------------------------------------|------------------------------------------|-------------|---------------|----------------------|----------------------|--------------|------------------------------------------------------------------------|
|    |                   |   |      |     |       |        |       |           | anus, dilated cardiomyopathy                                                                                                                                                                   |                                          |             |               |                      |                      |              |                                                                        |
| 7  | Proband           | F | 5169 | Liv | Exome | TruSeq | Y     | P         | Mid-face hypoplasia, obstructive sleep apnoea, corneal ulceration, progressive scoliosis, multiple severe respiratory tract infections with bronchiectasis, mild-moderate cognitive impairment | Parents 1st cousins                      | South Asian | #             | -                    | -                    | -            |                                                                        |
| 8  | Proband           | F | 5333 | BCH | Exome | TruSeq | Y     | S, LC, LL | None                                                                                                                                                                                           | Affected father and sister also analysed |             | -             | -                    | -                    | -            |                                                                        |
|    | Affected father   | M | 5335 |     |       |        | ss v5 | Y         | S                                                                                                                                                                                              |                                          |             |               |                      |                      |              | Headshape compatible with sagittal synostosis, no imaging confirmation |
|    | Affected sibling  | F | 6931 |     |       |        | Y     | BC        | Ollier disease, scoliosis, non-progressive muscular dystrophy (myopathic pseudo dystrophic changes on muscle biopsy)                                                                           |                                          |             |               |                      |                      |              |                                                                        |
| 9  | Proband           | M | 5520 | BCH | Exome | ss v5  | Y     | S, BC     | Crouzonoid facies, mild developmental delay, delayed dental eruption, small pointed teeth, class III malocclusion, patent ductus arteriosus, atrial septal defect, umbilical hernia            | Parents 1st cousins                      | South Asian | <i>IL11RA</i> | c.[98dupC]; [98dupC] | p.[G34fs*]; [G34fs*] | Homozygous   |                                                                        |
|    | Unaffected mother | F | 5518 |     |       |        |       |           |                                                                                                                                                                                                |                                          |             | <i>IL11RA</i> | c.98dupC             | p.G34fs*             | Heterozygous |                                                                        |
|    | Unaffected father | M | 5519 |     |       |        |       |           |                                                                                                                                                                                                |                                          |             | <i>IL11RA</i> | c.98dupC             | p.G34fs*             | Heterozygous |                                                                        |
| 10 | Proband           | M | 6306 | BCH | Exome | ss v5  | Y     | BC        | Mild learning difficulties, slightly short, broad thumbs, 5th finger clinodactyly, thick hair. Squint and hydrocele requiring surgery at 7yrs of age.                                          | Affected mother also analysed            |             | <i>MSX2</i>   | c.443C>T             | p.P148L              | Heterozygous |                                                                        |
|    | Affected mother   | F | 5326 |     |       |        | Y     | BC        | Short 5th fingers, thick hair                                                                                                                                                                  |                                          |             |               |                      |                      |              | <i>MSX2</i>                                                            |
| 11 | Proband           | M | 5219 | GOS | Exome | ss v5  | Y     | S, M      | Exorbitism, hypoplastic midface, downslanting palpebral fissures, blue sclerae, micrognathia, prominent nasal bridge, ligamentous                                                              |                                          |             | <i>FBN1</i>   | c.8226+5G>A          | (splice site)        | De novo      |                                                                        |

|    |                   |   |      |     |       |       |   |       |                                                                                                                                                                                                                                                                                                                                                                             |                     |             |       |           |         |                                                      |
|----|-------------------|---|------|-----|-------|-------|---|-------|-----------------------------------------------------------------------------------------------------------------------------------------------------------------------------------------------------------------------------------------------------------------------------------------------------------------------------------------------------------------------------|---------------------|-------------|-------|-----------|---------|------------------------------------------------------|
|    |                   |   |      |     |       |       |   |       | laxity, recurrent inguinal herniae, tall stature; lens subluxation and mild aortic dilatation aged 8 years                                                                                                                                                                                                                                                                  |                     |             |       |           |         |                                                      |
| 12 | Proband           | M | 6772 | GOS | Exome | ss v5 | Y | BC, M | Brachycephaly, slightly deviated septum, mild exorbitism, slightly deviated halluses                                                                                                                                                                                                                                                                                        |                     | South Asian | -     | -         | -       | -                                                    |
|    | Unaffected mother | F | 6379 |     |       |       |   |       |                                                                                                                                                                                                                                                                                                                                                                             |                     |             |       |           |         |                                                      |
|    | Unaffected father | M | 6380 |     |       |       |   |       |                                                                                                                                                                                                                                                                                                                                                                             |                     |             |       |           |         |                                                      |
| 13 | Proband           | M | 6796 | GOS | Exome | ss v5 | N | P     | High anterior hairline, hypertelorism, divergent squint, mild exorbitism, left upper eyelid retention cyst, wide eyebrows                                                                                                                                                                                                                                                   |                     |             | -     | -         | -       | -                                                    |
|    | Unaffected father | M | 5891 |     |       |       |   |       |                                                                                                                                                                                                                                                                                                                                                                             |                     |             |       |           |         |                                                      |
|    | Unaffected mother | F | 5892 |     |       |       |   |       |                                                                                                                                                                                                                                                                                                                                                                             |                     |             |       |           |         |                                                      |
| 14 | Proband           | M | 6589 | Liv | Exome | ss v5 | Y | M     | Flat mid-face, down-slanting palpebral fissures, low set ears, facial asymmetry, retracted pre-maxilla, right choanal stenosis, micrognathia, peg-like teeth with conical incisors, absent lateral incisors, pectus excavatum, scoliosis, long palms, slight digital shortening, mild 4/5 syndactyly of toes, Chiari malformation, moderate - severe learning difficulties. |                     | Middle East | HUWE1 | c.328C>T  | p.R110W | De novo                                              |
| 15 | Proband           | M | 6463 | GOS | Exome | ss v5 | N | BC    | Beta-Thalassaemia                                                                                                                                                                                                                                                                                                                                                           | Parents 1st cousins | South Asian | -     | -         | -       | -                                                    |
| 16 | Proband           | M | 6966 | GOS | Exome | ss v5 | Y | S, BL | Microcephaly, asymmetric ventriculomegaly, possible abnormalities on MRI brain scan involving the corpus callosum, posterior fossa and frontal and perisylvian cortex                                                                                                                                                                                                       |                     |             | ZIC1  | c.1101C>A | p.C367* | Heterozygous; absent in mother, father not available |
| 17 | Proband           | M | 6223 | Liv | Exome | ss v5 | N | P     | None                                                                                                                                                                                                                                                                                                                                                                        |                     |             | -     | -         | -       |                                                      |
|    | Unaffected mother | F | 6803 |     |       |       |   |       |                                                                                                                                                                                                                                                                                                                                                                             |                     |             |       |           |         |                                                      |
|    | Unaffected father | M | 6804 |     |       |       |   |       |                                                                                                                                                                                                                                                                                                                                                                             |                     |             |       |           |         |                                                      |

|    |                   |   |      |     |              |                   |   |       |                                                                                                                                                                                                                                                                                                       |  |             |        |          |         |         |
|----|-------------------|---|------|-----|--------------|-------------------|---|-------|-------------------------------------------------------------------------------------------------------------------------------------------------------------------------------------------------------------------------------------------------------------------------------------------------------|--|-------------|--------|----------|---------|---------|
| 18 | Proband           | M | 5856 | Liv | Exome        | ss v5             | Y | M     | Hypertelorism, wide anterior fontanelle, upper eyelid colobomas, deficient bony orbits with pseudoproptosis, small low-set dysplastic cupped ears, 2,3,4 syndactyly of fingers, bilateral talipes, bilateral undescended testes, imperforate anus, hypertrichosis, mild-moderate learning disability. |  |             | TWIST1 | c.350A>T | p.E117V | De novo |
|    | Unaffected father | M | 5854 |     |              |                   |   |       |                                                                                                                                                                                                                                                                                                       |  |             |        |          |         |         |
|    | Unaffected mother | F | 5855 |     |              |                   |   |       |                                                                                                                                                                                                                                                                                                       |  |             |        |          |         |         |
| 19 | Proband           | M | 5629 | GOS | Exome        | ss v5             | Y | LC    | Cleft soft palate, severe micrognathia, hypoplastic tongue with ankyloglossia, double outlet right ventricle (Fallots type), pulmonary artery stenosis, gastro-oesophageal reflux, small right pelvic kidney, partial 3/4 cutaneous syndactyly left hand and foot                                     |  |             | -      | -        | -       | -       |
|    | Unaffected father | M | 5673 |     |              |                   |   |       |                                                                                                                                                                                                                                                                                                       |  |             |        |          |         |         |
|    | Unaffected mother | F | 5674 |     |              |                   |   |       |                                                                                                                                                                                                                                                                                                       |  |             |        |          |         |         |
| 20 | Proband           | F | 5285 | BCH | Exome        | ss v5             | N | BC    | None                                                                                                                                                                                                                                                                                                  |  | South Asian | -      | -        | -       | -       |
| 21 | Proband           | F | 6701 | GOS | Whole Genome | Complete Genomics | Y | P     | Exorbitism, clover leaf skull                                                                                                                                                                                                                                                                         |  |             | KRAS   | c.40G>A  | p.V14I  | De novo |
|    | Unaffected mother | F | 6254 |     |              |                   |   |       |                                                                                                                                                                                                                                                                                                       |  |             |        |          |         |         |
|    | Unaffected father | M | 6256 |     |              |                   |   |       |                                                                                                                                                                                                                                                                                                       |  |             |        |          |         |         |
| 22 | Proband           | M | 6246 | BCH | Whole Genome | Complete Genomics | Y | S, BC | Mild facial dysmorphism, mild bilateral ptosis, prominent eyes, small nose, short fingers, bilateral palmer creases. Recurrent raised intracranial pressure requiring repeat surgery, seizures pre-op and 9 months of age. Father has minor digit anomalies.                                          |  |             | -      | -        | -       | -       |
|    | Unaffected mother | F | 5301 |     |              |                   |   |       |                                                                                                                                                                                                                                                                                                       |  |             |        |          |         |         |
|    | Unaffected father | M | 5302 |     |              |                   |   |       |                                                                                                                                                                                                                                                                                                       |  |             |        |          |         |         |

| Molecular genetic cases |                   |   |      |     |              |                                 |   |       |                                                                                                                                                                                                                |  |             |       |                  |           |                                                |
|-------------------------|-------------------|---|------|-----|--------------|---------------------------------|---|-------|----------------------------------------------------------------------------------------------------------------------------------------------------------------------------------------------------------------|--|-------------|-------|------------------|-----------|------------------------------------------------|
| 23                      | Proband           | F | 5561 | Ox  | Exome        | ss v4                           | Y | BC    | Bilateral superior vena cava, dilated cardiomyopathy, rudimentary right thumb, left hip dislocation, duplex kidney, anterior anus, bilateral inguinal herniae, growth deficiency                               |  |             | #     |                  |           |                                                |
|                         | Affected sibling  | M | 6181 |     |              | Nimble Gen SeqCap EZ Exome v2.0 | Y | BC    | Prenatal diagnosis of intrauterine growth retardation, abnormal ductus venosus, right talipes equinovarus, hypospadias, selective termination at 32 weeks' gestation, healthy twin born and developed normally |  |             | #     | -                | -         | -                                              |
| 24                      | Proband           | F | 6222 | Liv | Whole Genome | Complete Genomics               | Y | BC, M | Moderate developmental delay, hoarse cry                                                                                                                                                                       |  |             | AHDC1 | c.2373_2374delTG | p.C791fs* | De novo                                        |
|                         | Unaffected mother | M | 6183 |     |              |                                 |   |       |                                                                                                                                                                                                                |  |             |       |                  |           |                                                |
|                         | Unaffected father | F | 6184 |     |              |                                 |   |       |                                                                                                                                                                                                                |  |             |       |                  |           |                                                |
| 25                      | Proband           | F | 5928 | Ox  | Exome        | Nimble Gen SeqCap EZ Exome v2.0 | N | RC    | Hypertelorism                                                                                                                                                                                                  |  | South Asian | EFNB1 | c.325C>T         | p.R109C   | Heterozygous; inherited from hemizygous father |
| 26                      | Proband           | M | 6082 | Ox  | Exome        | Nimble Gen SeqCap EZ Exome v2.0 | N | RC    | Strabismus                                                                                                                                                                                                     |  |             | -     | -                | -         | -                                              |
| 27                      | Proband           | F | 6122 | Ox  | Exome        | Nimble Gen SeqCap EZ Exome v2.0 | N | RC    | None                                                                                                                                                                                                           |  |             | -     | -                | -         | -                                              |
| 28                      | Proband           | F | 6030 | Ox  | Exome        | Nimble Gen SeqCap EZ Exome v2.0 | N | LC    | None                                                                                                                                                                                                           |  |             | -     | -                | -         | -                                              |

|     |         |   |      |     |       |                                 |   |       |                                                                                                                                                                                                                                                    |  |             |       |           |         |         |
|-----|---------|---|------|-----|-------|---------------------------------|---|-------|----------------------------------------------------------------------------------------------------------------------------------------------------------------------------------------------------------------------------------------------------|--|-------------|-------|-----------|---------|---------|
| 29* | Proband | M | 5762 | GOS | Exome | Nimble Gen SeqCap EZ Exome v2.0 | Y | P     | Crouzonoid appearance, mild global developmental delay; 3 years old, necrotising pneumonia and broncho-pleural fistula                                                                                                                             |  | South Asian | STAT3 | c.1915C>T | p.P639S | De novo |
| 30  | Proband | M | 5657 | Ox  | Exome | Nimble Gen SeqCap EZ Exome v2.0 | Y | S     | Mild facial dysmorphism, Chiari malformation, mild developmental delay, duplication of <i>SH2B1</i> on array CGH                                                                                                                                   |  |             | -     | -         | -       | -       |
| 31  | Proband | F | 5944 | Ox  | Exome | Nimble Gen SeqCap EZ Exome v2.0 | Y | S, LC | Left hemifacial hypertrophy, high anterior hairline, frontal bossing, low set ears, single palmar creases, mild bilateral cutaneous syndactyly, 4/5 clinobrachydactyly of fingers, small toes; hypotonic with moderate speech and cognitive delay. |  |             | -     | -         | -       | -       |
| 32  | Proband | F | 6136 | BCH | Exome | Nimble Gen SeqCap EZ Exome v2.0 | N | BC    | 3,4,5 clinodactyly of toes (medially deviated), mild hypertelorism, mother clinically normal                                                                                                                                                       |  |             | -     | -         | -       | -       |
| 33  | Proband | M | 5322 | Ox  | Exome | Nimble Gen SeqCap EZ Exome v2.0 | N | S, BL | None                                                                                                                                                                                                                                               |  | African     | -     | -         | -       | -       |
| 34* | Proband | M | 6569 | Liv | Exome | Nimble Gen SeqCap EZ Exome v2.0 | Y | P     | Low anterior hairline, synophrys, small mouth. Visual loss secondary to raised intracranial pressure; shunted. Empty sella. Moderate developmental delay and learning disability, attention deficit disorder, behavioural problems.                |  |             | -     | -         | -       | -       |
| 35  | Proband | F | 6568 | GOS | Exome | Nimble Gen SeqCap               | N | BC    | None                                                                                                                                                                                                                                               |  |             | -     | -         | -       | -       |

|    |         |   |      |     |       | EZ<br>Exome<br>v2.0                            |   |      |                                                                                                                                                                                                                                                                                                                       |                                                                           |  |              |           |         |                                                      |  |
|----|---------|---|------|-----|-------|------------------------------------------------|---|------|-----------------------------------------------------------------------------------------------------------------------------------------------------------------------------------------------------------------------------------------------------------------------------------------------------------------------|---------------------------------------------------------------------------|--|--------------|-----------|---------|------------------------------------------------------|--|
| 36 | Proband | M | 4332 | Ox  | Exome | Nimble<br>Gen<br>SeqCap<br>EZ<br>Exome<br>v2.0 | Y | S, M | Trigonocephaly associated with hypertelorism, small ventricular septal defect, mild expressive language deficit                                                                                                                                                                                                       |                                                                           |  | -            | -         | -       | -                                                    |  |
| 37 | Proband | F | 4473 | Ox  | Exome | Nimble<br>Gen<br>SeqCap<br>EZ<br>Exome<br>v2.0 | Y | LC   | Facial asymmetry, progressive onset of aggressive outbursts, ritualised behaviours and language delay, hyperphagic obesity, streak ovaries                                                                                                                                                                            |                                                                           |  | <i>NTRK2</i> | c.1330G>T | p.G444* | Heterozygous; absent in mother, father not available |  |
| 38 | Proband | F | 6721 | BCH | Exome | Nimble<br>Gen<br>SeqCap<br>EZ<br>Exome<br>v2.0 | Y | BC   | Developmental delay, congenital hip dislocation (treated with Spica), positional talipes, congenital dislocation left knee resolved spontaneously, midface hypoplasia, downslanting palpebral fissures, bilateral sensorineural hearing loss, seizures. Both parents have learning disability and father has epilepsy |                                                                           |  | -            | -         | -       | -                                                    |  |
| 39 | Proband | F | 6722 | Ox  | Exome | Nimble<br>Gen<br>SeqCap<br>EZ<br>Exome<br>v2.0 | N | LC   | None                                                                                                                                                                                                                                                                                                                  |                                                                           |  | -            | -         | -       | -                                                    |  |
| 40 | Proband | M | 6368 | Ox  | Exome | Nimble<br>Gen<br>SeqCap<br>EZ<br>Exome<br>v2.0 | Y | S    | None                                                                                                                                                                                                                                                                                                                  | Male sibling and maternal uncle also reported to have sagittal synostosis |  | -            | -         | -       | -                                                    |  |

S; sagittal, LC; Left Coronal; RC; Right Coronal, BC; Bicoronal, M; Metopic, LL; Left Lambdoid, RL; Right Lambdoid, BL; Bilambdoid, P; Pansynostosis

\*Also prioritised by clinical geneticist

§Based on additional clinical features or positive family history

#Likely novel disease gene, still undergoing validation

\*BCH, Birmingham Children's Hospital; GOS, Great Ormond Street Hospital; Liv, Alder Hey Children's Hospital; Ox, John Radcliffe Hospital.

¥Parental DNA unavailable.
